# Supplementary material for: Facilitators and challenges to implementing a researcher-in-residence model to build research capacity in adult social care
Source: Research Square preprint supplement (doi:10.21203/rs.3.rs-7810350/v1), 2025-10-27
Supplement: Supplementary file 1 [file 09ceb673ade3a93a339f848e.docx]

## Additional File 2: Interview topic guide

| **Introduction** |  |
| --- | --- |
| **Pre-role** | - Prior knowledge, perceptions, and experience of the RiR model. - Initial expectations of the RiR role. - Perceived role of RiRs within the partnership. - Recruitment process and selection criteria for RiRs. |
| **Early experiences** | - Early experiences of being a RiR/interacting with the RiR. - Challenges encountered at the outset. - Initial support mechanism for the RiR. - Initial successes and contributions. - Identified gaps and lessons learned. |
| **How the RiR role developed** | - Experiences during the first two years of the RiR model. - Issues over the first few years, how they were dealt with (or not). |
| **Impact of the RiR role** | - Early or incremental changes (e.g. building trust, networks). - Longer term changes and signs of cultural change. - Systematic changes to generate active research culture. |
| **Current reflections** | - Evolving understandings of the RiR role in research partnerships. - Strengthening support mechanisms for RiR. - Determinants of successful embedded researcher roles. - Areas for refinement in RiR implementation. |
| **Looking forward** | - Priorities for the RiR in the final two years. - Creating and sustaining long-term change through the RiR model. - Unexplored perspectives and additional reflections on the RiR role. |
