# Supplementary material for: Facilitators and challenges to implementing a researcher-in-residence model to build research capacity in adult social care
Source: Research Square preprint supplement (doi:10.21203/rs.3.rs-7810350/v1), 2025-10-27
Supplement: Supplementary file 2 [file 8ea42e2586fdb969cdbaf93e.docx]

## Additional File 3: SELECT-IT Worksheet A comparing CFIR and CICI

High-level worksheet to apply the SELECT-IT meta-framework including each step [1–4] to identify project-specific purposes and explore potential theories, models, and frameworks (TMFs).

| **Specify the Implementation Challenge** | **Step 1 – Determine the Purpose of Using TMF1**  Identify the goal(s) or function(s) you need the TMF to achieve, ensuring these align with your specific project objectives. | **Step 2 – Identify Potential TMFs**  a) Search for TMFs commonly used in similar contexts, populations, or interventions; and  b) Create a shortlist of TMFs that appear to align with the purpose and context. | **Step 3 – Evaluate the Attributes of TMFs2**  Depending on your project team’s time and resources, you can choose between two approaches to evaluation the short-listed TMFs against attributes:   1. ***High-level assessment (this section of Worksheet A)***  - Focus on the five overarching domains (*Clarity and Structure*, *Scientific Strength and Evidence*, *Applicability and Usability*, *Equity and Sociocultural Responsiveness*, and *System and Partner Integration*). - Conduct a broad evaluation of each TMF to quickly gauge whether it is likely to meet your project’s needs. - Summarize strengths and limitations at a domain level without rating every individual attribute.  1. ***Detailed assessment and scoring (Worksheet B)***  - For a more in-depth analysis, systematically rate each TMF against the 24 attributes within those five domains. - Use the 1–3 (or N/A) scoring system to capture nuances, add notes for each attribute, and compare TMFs. - This approach helps ensure a rigorous decision, especially for projects with higher stakes or complexity. | **Step 4 – Assess Practical Considerations3**  Once you have identified one or more promising TMFs based on their conceptual and empirical alignment with your project goals, it is important to ensure they are also feasible to apply in your particular context. This step helps you verify whether your team has the necessary resources, skills, and readiness to use the chosen TMF effectively. In the worksheet, you can add a brief **“Practical Considerations”** section for each candidate TMF, listing any issues or adaptations required across:   1. Project fit 2. Available resources 3. Team expertise and readiness |
| --- | --- | --- | --- | --- |
| To explore the experience of the Researcher in Residence (RiR) and Kent Research Partnership (KRP) team members to understand the factors affecting successful implementation of a RiR model as a means of building research capacity in adult social care, especially challenges and facilitators. | Primary purpose:  4. Guiding the identification of determinants:  ‘Identify implementation determinants (i.e. barriers, facilitators)’ (1)  Secondary purpose:  6. Guiding evaluation and causal explanation:  ‘Explain why or how an intervention works or not (i.e., causal mechanisms)’ (1) | Updated Consolidated Framework for Implementation Research (CIFR) - original CFIR and updated version used in numerous research studies across a wide range of implementation contexts especially clinical and applied health settings (2–5). Both have also been used in educational settings (6–8).  Context and Implementation of Complex Interventions (CICI) framework - examples of the application of CICI are predominantly health-focused (9–11), although the framework has also been used in education (12), and social care (13). | Updated CFIR   1. Clarity and structure:   ‘CFIR provides *[5]* clear domains and a significant number of constructs *[84]* for assessing implementation barriers and facilitators at the … system and organizational levels’ (1). In addition, the Outcomes Addendum includes implementation and innovation outcomes.   1. Scientific strength and evidence:   ‘CFIR has extensive empirical evidence across diverse settings’ (1). CFIR 'is one of the most highly cited implementation determinant frameworks in the field' (14).   1. Applicability and usability:   ‘CFIR offers a range of robust tools and web-based resources guidance for system-level implementation. *[It is]* adaptable but require*[s*] appropriate expertise.’ (1).   1. Equity and sociocultural responsiveness:   ‘CFIR has a limited focus on equity but *[is]* adaptable to incorporate sociocultural considerations’ (1).   1. System and partner integration:   ‘CFIR addresses micro, meso, and macro-level assessments and policies effectively. It also emphasizes the consideration of the characteristics and roles of a range individuals involved in the implementation process (1), which was felt to be particularly relevant to this study.  CICI   1. Clarity and structure:   ‘The CICI framework … comprises the three dimensions context, implementation and setting. The context comprises the seven domains: geographical, epidemiological, socio-cultural, socio-economic, ethical, legal, political context. Implementation consists of implementation theory, implementation process, implementation strategies, implementation agents and implementation outcomes’ *(15).*   1. Scientific strength and evidence:   ‘The CICI framework focuses specifically on the context and the complex interplay between its multi-level elements whereas other well-known frameworks are less detailed in their attention to context (e.g. CFIR)’ (16).   1. Applicability and usability:   ‘The framework can be applied in systematic reviews and HTA’ *[health technology assessment] ‘*as well as primary research … Researchers conducting systematic reviews or HTA’ *[are encouraged]* ‘to use the CICI framework in conjunction with a system-based logic model … as two complementary tools’ (15)   1. Equity and sociocultural responsiveness:   CICI does not focus on equity although equity considerations could be included in the ‘ethical’ or ‘legal’ context domains. There is also a 'socio-cultural' context domain to which sociocultural responsiveness and 'other capabilities and habits acquired by a group' could be referenced (15).   1. System and partner integration:   CICI recognises that 'implementation, context and setting can occur' at 'the micro, meso and macro levels' and that ‘interventions are typically implemented simultaneously within different settings and at multiple levels’ (15)*.* | Practical considerations   1. Project fit:   The five domains of the (updated) CFIR were all relevant to the study with the 'outer setting', 'inner setting' and 'individuals' domains being particularly appropriate. The implementation and innovation outcomes in the Outcomes Addendum made the framework even more potentially useful and applicable to the study, as did its flexibility/adaptability, i.e. that irrelevant domains and constructs can be ignored and study-specific ones created if/as necessary (2).   1. Available resources:   Since CFIR resources and guidance are both clear and comprehensive, no issues were anticipated in terms of ‘time’ or ‘staff capacity’ (1).   1. Team expertise and readiness:   The team were confident about using CFIR given both its widespread application to intervention implementation studies across diverse settings/contexts and the PI’s familiarity with it.  Practical considerations   1. Project fit:   Four of the seven CICI context domains were relevant to the study: socio-cultural, socio-economic, political context and, to a much lesser extent, 'geographical', i.e. in the context of considering ‘infrastructure at a given location, which could result in geographical isolation' (15), Additional File 3). Two of CICI context domains were not applicable to this study: ‘epidemiological' and ‘legal; with the former, in particular, reflecting the frameworks origins in and focus on public health (17).   1. Available resources:   CICI resources and guidance are clear and comprehensive, and include an expert consultation guide, data extraction tools and worked examples (15).   1. Team expertise and readiness:   The team were less confident about using CICI given both the inapplicability of two of the domains and their lack of familiarity with it. |

1. Purposes include the following: **(1) Enhancing conceptual clarity** (Clearly define and distinguish concepts, terms, constructs, or ideas); **(2) Anticipating change and guiding inquiry** (Help predict provider behaviour, outcomes and intended/unintended consequences of change, Inform the development of study questions or hypotheses); **(3) Guiding the implementation process** (Structure and guide the implementation process, Guide the identification and engagement of key stakeholders); **(4) Guiding the identification of determinants** (Identify implementation determinants [i.e., barriers, facilitators]); **(5) Guiding the design and adaptation of implementation strategies** (Guide the selection, design and refinement of implementation strategies, Guide the contextual adaptation of implementation strategies); **(6) Guiding evaluation and causal explanation** (Guide the development of the evaluation strategy and data collection, Explain why or how an intervention works or not (i.e., causal mechanisms), Specify the relationships between constructs to be tested, Inform data analysis);and **(7) Guiding interpretation and dissemination** (Guide the interpretation and dissemination of implementation project findings).
2. The full list of attributes across the five domains is presented in Worksheet B below.
3. Practical considerations include the following: **(1)** **Team expertise and readiness** (Team knowledge and skills, Alignment with disciplinary backgrounds, and Acceptability); **(2) Resource availability** (Resource sufficiency to apply the TMF); and **(3) Project fit** (Alignment with the project’s context and scope, availability of relevant data, timing, target population or behavior/intervention, and desired outcomes).

**References**

1. Fontaine G, Mooney M, Porat-Dahlerbruch J, Cahir K, Ellen M, Spinewine A, et al. Advancing the selection of implementation science theories, models, and frameworks: a scoping review and the development of the SELECT-IT meta-framework. Implementation Science. 2025;20(1):24.

2. Damschroder LJ, Reardon CM, Widerquist MAO, Lowery J. The updated Consolidated Framework for Implementation Research based on user feedback. Implementation Science. 2022;17(1).

3. Birken SA, Rohweder CL, Powell BJ, Shea CM, Scott J, Leeman J, et al. T-CaST: an implementation theory comparison and selection tool. Implementation Science. 2018;13(1):143.

4. Kirk MA, Kelley C, Yankey N, Birken SA, Abadie B, Damschroder L. A systematic review of the use of the Consolidated Framework for Implementation Research. Implementation Science. 2015;11(1):72.

5. Nilsen P. Making sense of implementation theories, models and frameworks. Implementation Science. 2015;10(1):53.

6. Mullin AC, Sharkey JD, Barnett M. Advancing trauma informed practices in schools using the Consolidated Framework for Implementation Research. Front Educ. 2024;9.

7. Allen M, Wilhelm A, Ortega LE, Pergament S, Bates N, Cunningham B. Applying a Race(ism)-Conscious Adaptation of the CFIR Framework to Understand Implementation of a School-Based Equity-Oriented Intervention. Ethn Dis. 2021;31(Suppl):375–88.

8. Wilhelm AK, Schwedhelm M, Bigelow M, Bates N, Hang M, Ortega L, et al. Evaluation of a school-based participatory intervention to improve school environments using the Consolidated Framework for Implementation Research. BMC Public Health. 2021;21(1):1615.

9. McGilton KS, Cumal A, Corsi D, Gingrich S, Zheng N, Escrig-Pinol A. Context matters when implementing patient centred rehabilitation models for persons with cognitive impairment: a case study. BMC Health Serv Res. 2021;21(1):204.

10. Lamahewa K, Griffin S, Seward N, Temmerman M, West J, de Melo M, et al. Protocol for intervention development to improve adolescent perinatal mental health in Kenya and Mozambique: The INSPIRE project. SSM - Mental Health. 2023;3:100200.

11. Moloney M, Taggart L, Hennessy T, Doody O. Exploring Implementation of Reasonable Adjustments in Hospitals for People With Intellectual Disability: Using a Realist Lens. J Adv Nurs. 2024 Oct 24;

12. Oxley R, Mahdi S, Padgett L, Bremner M, Brackley D, Doherty B, et al. Improving access to free school meals: evaluating the implementation of a new free school meal auto-enrolment process. The Lancet. 2024;404:S38.

13. Parsons J, Burton E, Graff L, Metzelthin S, O’Connell H, Tuntland H. Reablement as an evolution in home care: a comparison of implementation across five countries. In: Rostgaard T, Parsons J, Tuntland H, editors. Reablement in Long-Term Care for Older People. Bristol Policy Press; 2023. p. 68–90.

14. Skolarus TA, Lehmann T, Tabak RG, Harris J, Lecy J, Sales AE. Assessing citation networks for dissemination and implementation research frameworks. Implementation Science. 2017;12(1):97.

15. Pfadenhauer LM, Gerhardus A, Mozygemba K, Lysdahl KB, Booth A, Hofmann B, et al. Making sense of complexity in context and implementation: the Context and Implementation of Complex Interventions (CICI) framework. Implementation Science. 2017;12(1):21.

16. Mielke J, De Geest S, Zúñiga F, Brunkert T, Zullig LL, Pfadenhauer LM, et al. Understanding dynamic complexity in context—Enriching contextual analysis in implementation science from a constructivist perspective. Frontiers in Health Services. 2022;2.

17. ACCORDS Dissemination and Implementation Science Program. ACCORDS Dissemination and Implementation Science Program, University of Colorado, Denver et al. 2025. <https://medschool.cuanschutz.edu/accords/cores-and-programs/dissemination-implementation-core>. Accessed 7 Oct 2025
